# Supplementary material for: A novel strategy to block mitotic progression for targeted therapy
Source: PubMed Central journal article supplement (PMC6945239; doi:10.1016/j.ebiom.2019.10.013), 2019-10-25

## Supplementary method for synthesis of CP5V (VHL Ligand 1-PEG5-apcin-A)

### VHL Ligand 1-PEG5-apcin-A

**((S)-25-((2S,4R)-4-hydroxy-2-((4-(4-methylthiazol-5-yl)benzyl)carbamoyl)pyrrolidine-1-carbonyl)-26,26-dimethyl-5,23-dioxo-8,11,14,17,20-pentaoxa-4,24-diazaheptacosyl (2,2,2-trichloro-1-(pyrimidin-2-ylamino)ethyl)carbamate)**

#### Step 1

To a 2 ml vial containing 4,7,10,13,16-pentaoxanonadecanedioic acid (629 mg, 2 Eq, 1.86 mmol) was added DMF (3 mL) and the mixture was cooled in an ice/water bath. Then, HATU (353 mg, 1 Eq, 929  $\mu$ mol) and DIPEA (480 mg, 0.65 mL, 4 Eq, 3.72 mmol) were added. The mixture was stirred in the cold bath for 15 min after which (2S,4R)-1-((R)-2-amino-3,3-dimethylbutanoyl)-4-hydroxy-N-(4-(4-methylthiazol-5-yl)benzyl)pyrrolidine-2-carboxamide (400 mg, 1 Eq, 929  $\mu$ mol) in DMF (0.2 mL) was added. The reaction mixture was allowed to stir overnight as the ice bath expired for 16 h after which LC/MS indicated formation of product. The mixture was directly purified by RP HPLC eluting with 5 to 50 % acetonitrile in water (0.1 % Formic acid modifier) to give (S)-21-((2S,4R)-4-hydroxy-2-((4-(4-methylthiazol-5-yl)benzyl)carbamoyl)pyrrolidine-1-carbonyl)-22,22-dimethyl-19-oxo-4,7,10,13,16-pentaoxa-20-azatricosanoic acid (440 mg, 63.1 %) as a light yellow oil. LC/MS, NMR CMIDD-159-1-2.

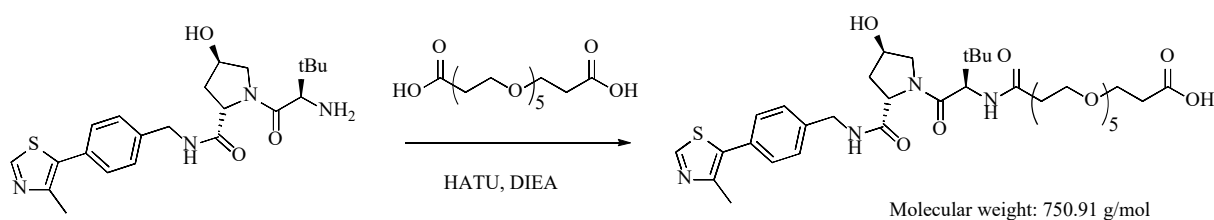

#### LC/MS

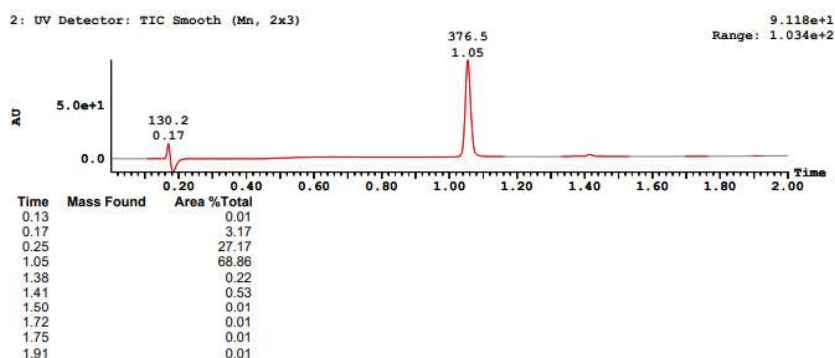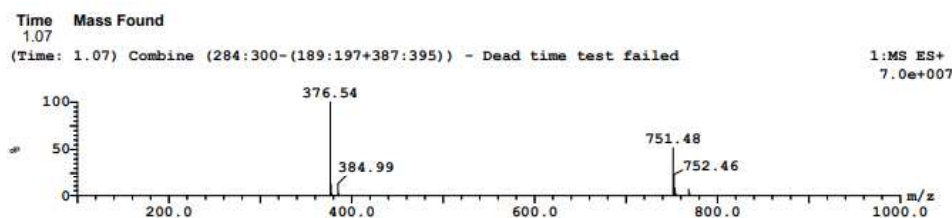

# 1H NMR

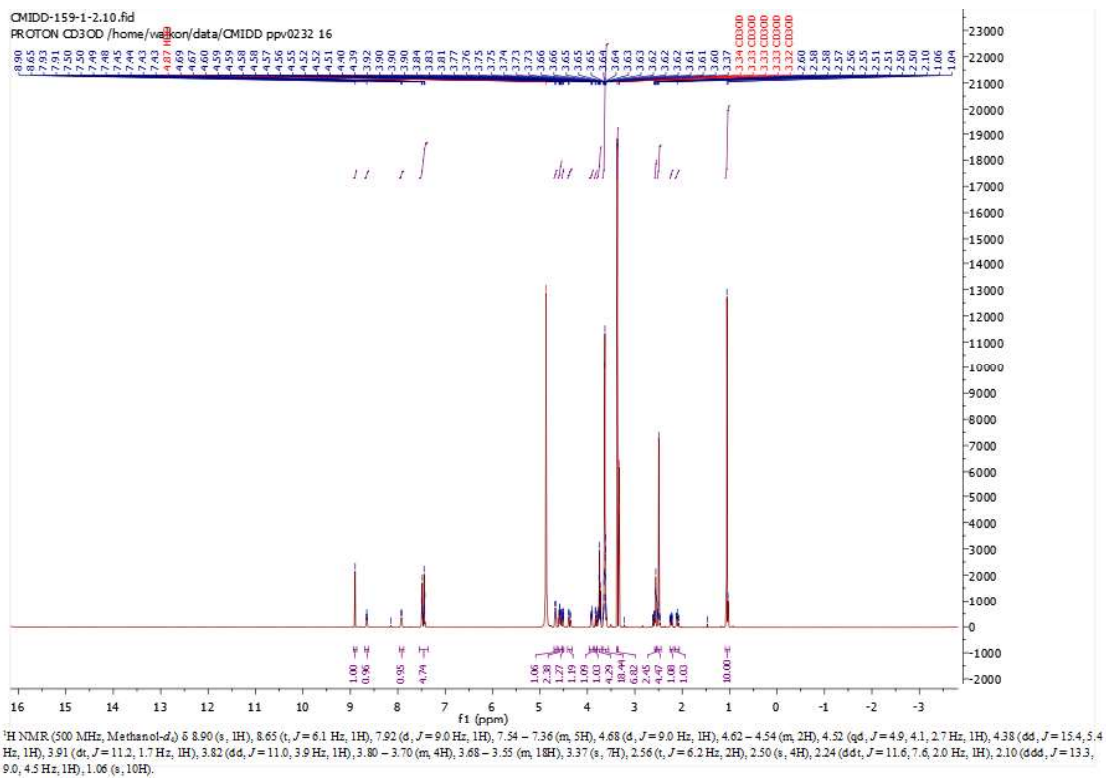

# 13C NMR

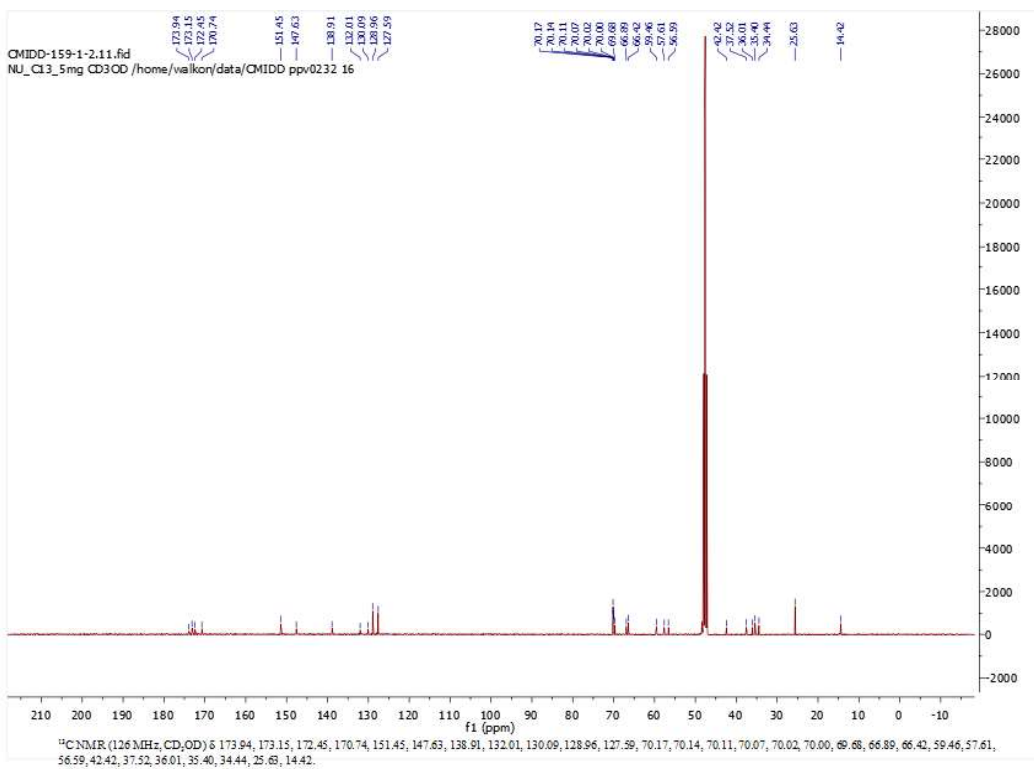

## Step 2

To a solution of (R)-21-((2S,4R)-4-hydroxy-2-((4-(4-methylthiazol-5-yl)benzyl)carbamoyl)pyrrolidine-1-carbonyl)-22,22-dimethyl-19-oxo-4,7,10,13,16-pentaoxa-20-azatricosanoic acid (200 mg, 1 Eq, 266  $\mu$ mol) in DMF (2 mL) in an ice/water bath was simultaneously added 3-aminopropyl (2,2,2-trichloro-1-(pyrimidin-2-ylamino)ethyl)carbamate [apcin-A] (183 mg, 2 Eq, 533  $\mu$ mol) and HATU (253 mg, 2.5 Eq, 666  $\mu$ mol). Right after addition, DIEA (138 mg, 186  $\mu$ L, 4 Eq, 1.07 mmol) was added and the reaction mixture was stirred as the ice bath expired for 2 h after which LC/MS indicated product. The mixture was directly purified via RP HPLC eluting with 10 to 90 % acetonitrile in water (0.1 % formic acid modifier) to give (S)-25-((2S,4R)-4-hydroxy-2-((4-(4-methylthiazol-5-yl)benzyl)carbamoyl)pyrrolidine-1-carbonyl)-26,26-dimethyl-5,23-dioxo-8,11,14,17,20-pentaoxa-4,24-diazaheptacosyl (2,2,2-trichloro-1-(pyrimidin-2-ylamino)ethyl)carbamate (214 mg, 74.7 %) as a yellow oil. LC/MS, NMR CMIDD-159-6-2. Note: on LC/MS, M/2 seen.

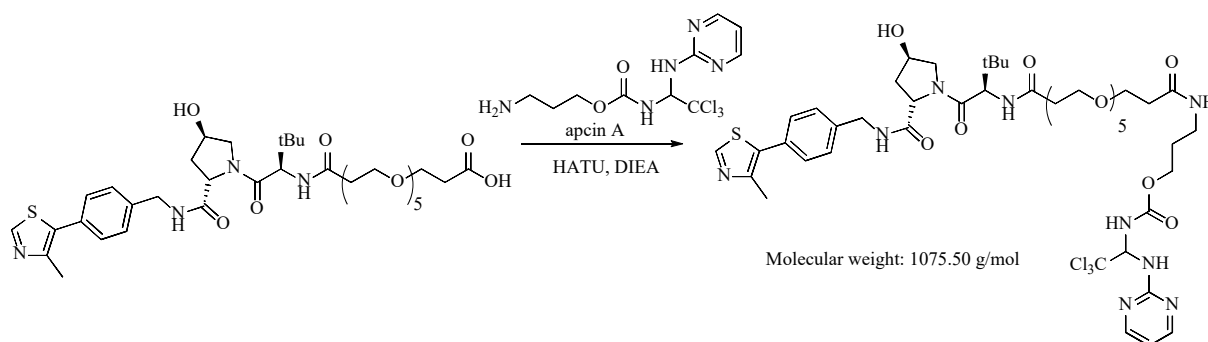

## LC/MS

2: UV Detector: TIC Smooth (Mn, 2x3)

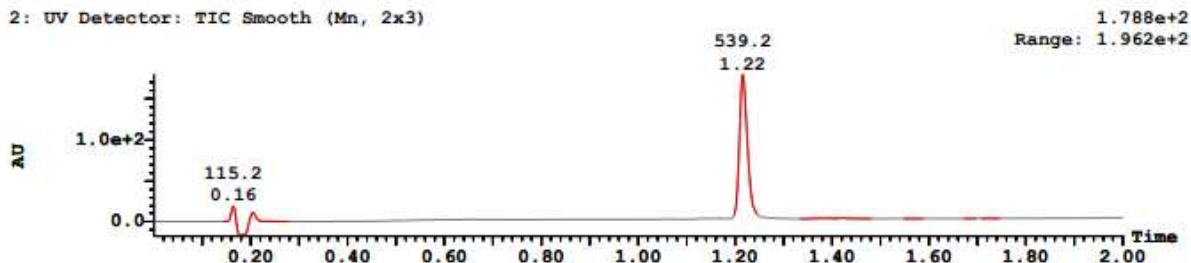

Time Mass Found

1.24

(Time: 1.24) Combine (331:347-(234:242+444:452)) - Dead time test failed

1:MS ES+  
8.0e+007

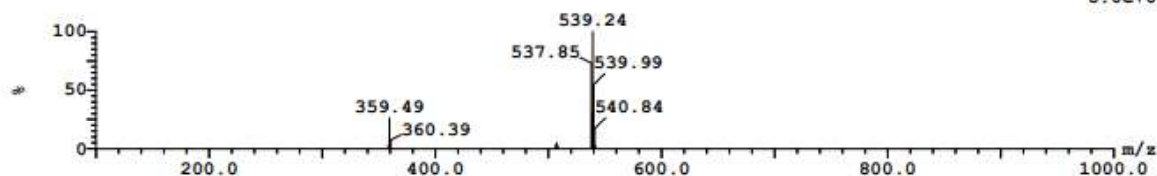

# 1H NMR

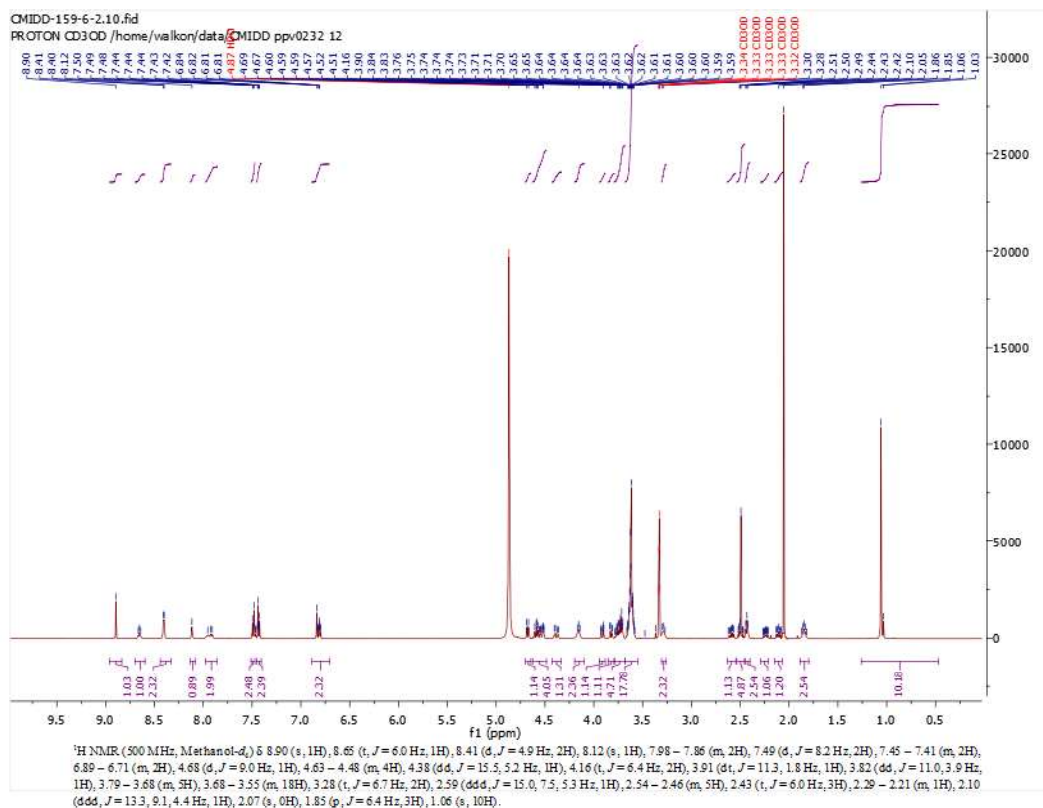

# 13C NMR

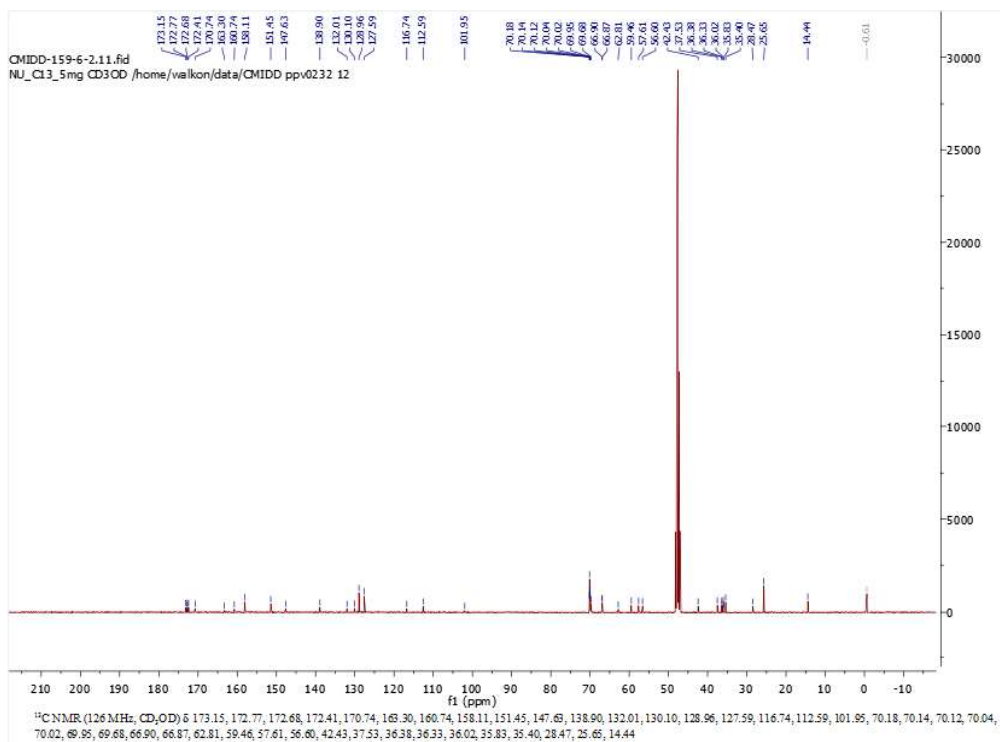

Supplement: mmc2.pdf [file mmc2.pdf]
